# Supplementary material for: Selective transfer of maternal antibodies in preterm and fullterm children
Source: PubMed Central journal article supplement (PMC9440225; doi:10.1038/s41598-022-18973-4), 2022-09-02
Supplement: 41598_2022_18973_MOESM3_ESM.pdf [file 41598_2022_18973_MOESM3_ESM.pdf]

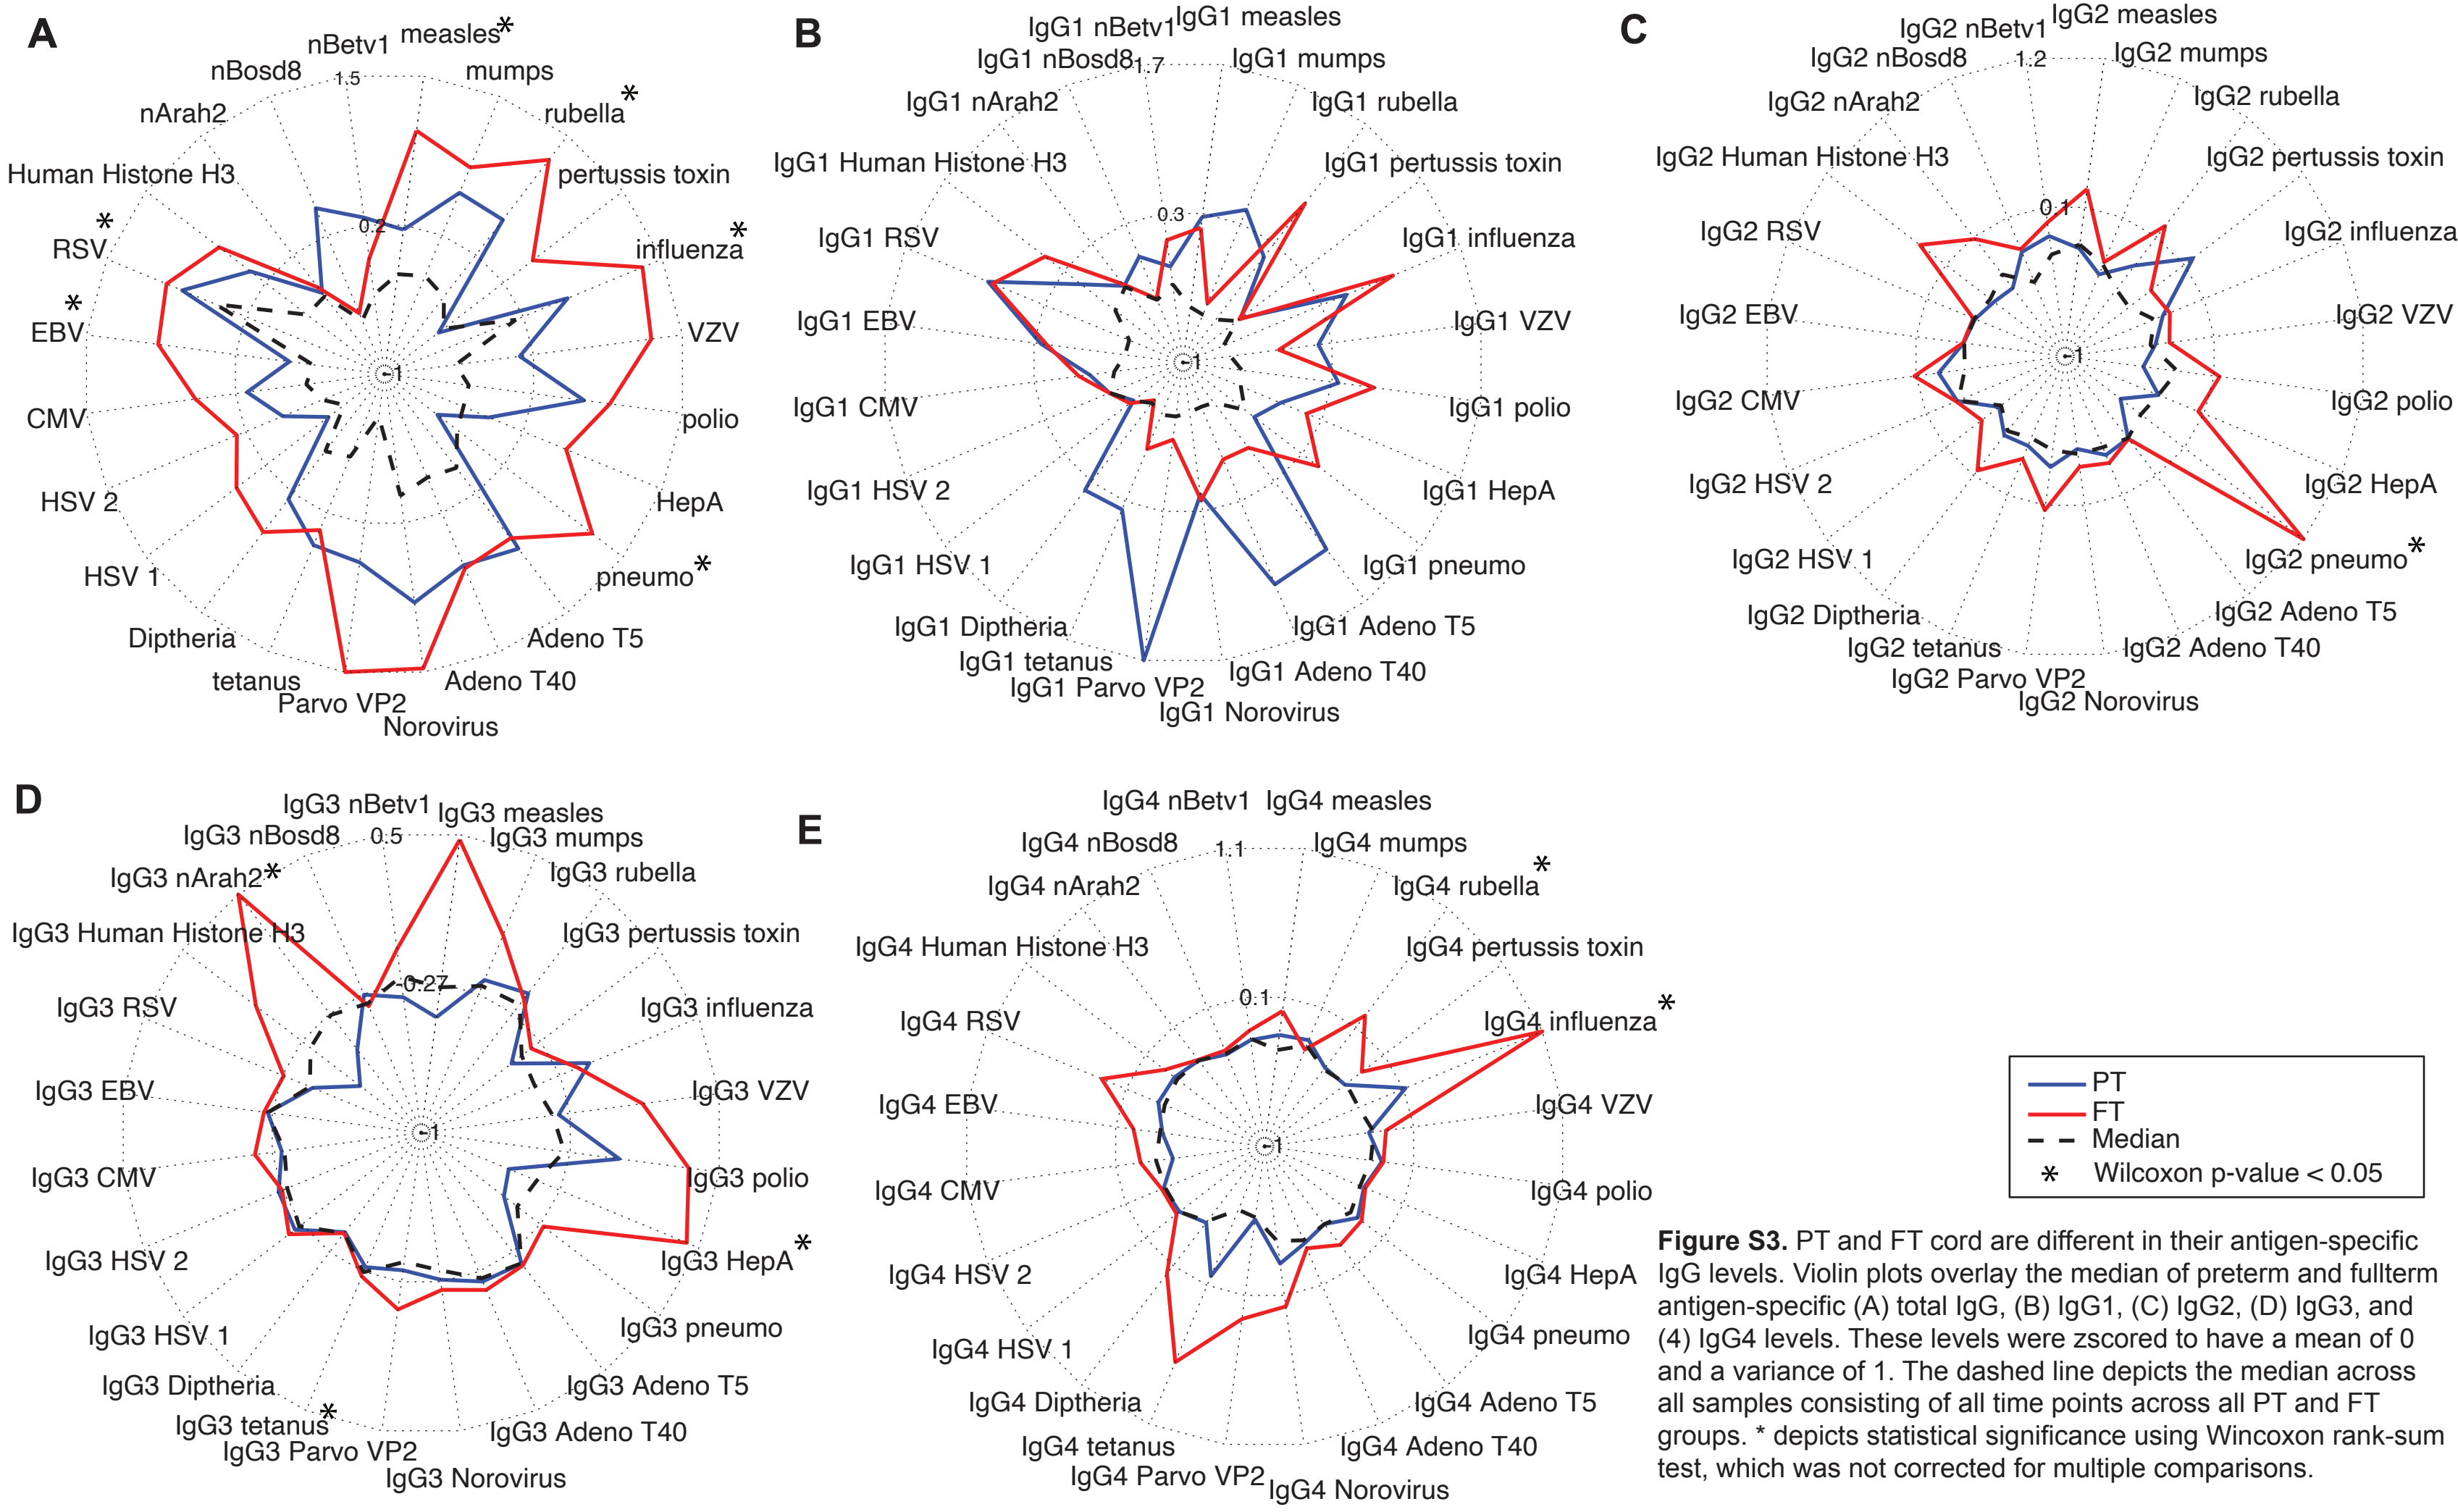

**Figure S3.** PT and FT cord are different in their antigen-specific IgG levels. Violin plots overlay the median of preterm and fullterm antigen-specific (A) total IgG, (B) IgG1, (C) IgG2, (D) IgG3, and (E) IgG4 levels. These levels were zscored to have a mean of 0 and a variance of 1. The dashed line depicts the median across all samples consisting of all time points across all PT and FT groups. \* depicts statistical significance using Wilcoxon rank-sum test, which was not corrected for multiple comparisons.
