# Supplementary material for: Selective transfer of maternal antibodies in preterm and fullterm children
Source: PubMed Central journal article supplement (PMC9440225; doi:10.1038/s41598-022-18973-4), 2022-09-02
Supplement: 41598_2022_18973_MOESM4_ESM.pdf [file 41598_2022_18973_MOESM4_ESM.pdf]

**Table S1.** Antigen Reagents

| <b>Pathogen</b>                   | <b>Antigen</b>                   | <b>Vendor, Catalog #</b>                                         |
|-----------------------------------|----------------------------------|------------------------------------------------------------------|
| Measles, Edmonton                 | Inactivated Virus                | BioRad, PIP013                                                   |
| Mumps, Enders                     | Inactivated Virus                | BioRad, PIP014                                                   |
| Rubella, HPV-77                   | Inactivated Virus                | BioRad, PIP044                                                   |
| Varicella zoster virus (VZV)      | gE(Orf68)                        | Made in house                                                    |
| Epstein barr virus (EBV)          | gp350/220                        | Immune Technology, IT-005-035p                                   |
| Herpes simplex virus (HSV)        | gD (1), gC (2)                   | Immune Technology, IT-005-055p, IT-005-011p                      |
| Influenza A                       | HA H1N1 and H3N2                 | Immune Technology, IT-003-0042ΔTMp, IT-003-001p, IT-003-0011ΔTMp |
| Respiratory Syncytial virus (RSV) | Pre and post A and B             | Barney Graham, NIH                                               |
| Cytomegalovirus (CMV)             | gH pentamer complex              | CMV-PENT-100                                                     |
| Poliovirus                        | Polio vaccine salk inactive      | MGH Pharmacy, 976210                                             |
| Tetanus                           | Toxoid                           | UMass Medical Center                                             |
| Pertussis, Bordetella             | Toxin                            | List Biological Laboratories, #180                               |
| Hepatitis A                       | Vaccine, HAVRIX                  | MGH Pharmacy, 5SR75                                              |
| Haemophilus influenzae B          | Vaccine, Polysaccharide conj-tet | MGH Pharmacy, 2000696                                            |
| Hepatitis B virus (HBV)           | HBsAg adw                        | Genway, GWB-B11E0A                                               |
| Pneumococcus                      | Pneumovax vaccine                | MGH Pharmacy, 8524700                                            |
| Adenovirus                        | Type 5 and 40                    | BioRad, MPP002; Native Antigen Co., A40P-100                     |
| Norovirus                         | Virus-like particle 1            | Native Antigen Co., REC31620-100                                 |
| Parvovirus                        | Virus-like particle 2            | Native Antigen Co., PV-VP2-100                                   |
| Diphtheria                        | Toxin                            | Native Antigen Co., DIP-TNL                                      |
| Human Histone H3                  | Citrulline peptide               | Abcam, ab32876                                                   |
| Peanut allergen                   | nAra h 2                         | Indoor Biotechnology, NA-AH2-1                                   |
| Bovine milk allergen              | nBos d 8                         | Indoor Biotechnology, NA-BD8-1                                   |
| Birch pollen allergen             | nBet v 1                         | Indoor Biotechnology, NA-BV1-1                                   |
